# Supplementary material for: Preparation and Application of a Hydrochar-Based Palladium Nanocatalyst for the Reduction of Nitroarenes
Source: MDPI journal article supplement (doi:10.3390/molecules26226859), 2021-11-13
Supplement: s1 [file s1]

Supplementary Material

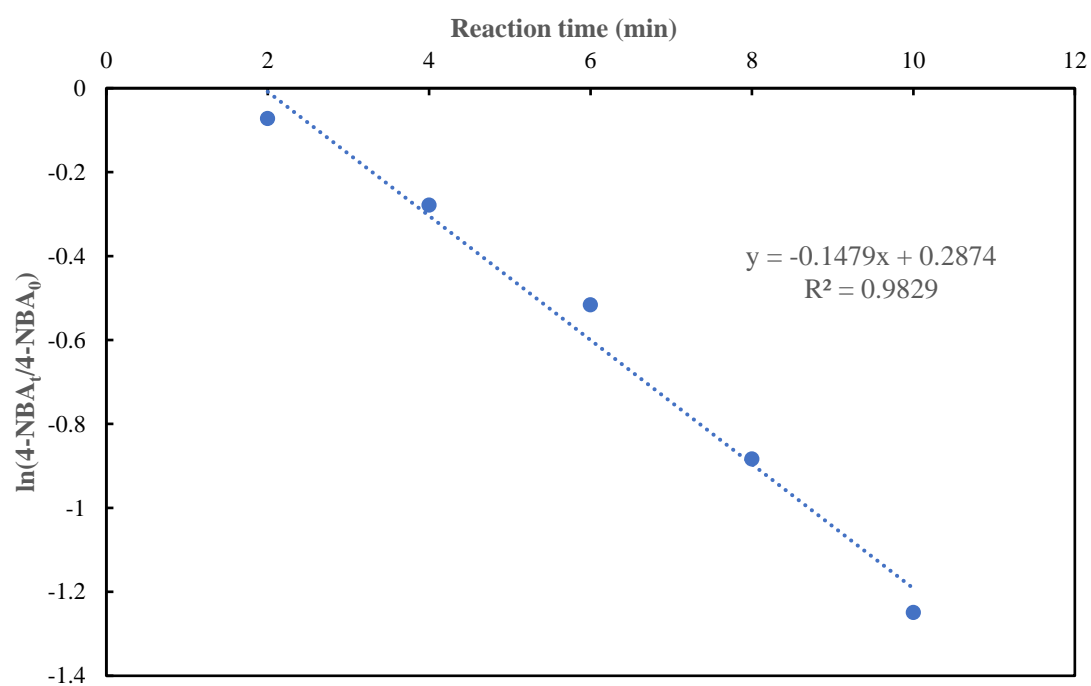

**Figure S1.** Fitting of the 4-NBA reduction data to the pseudo first-order kinetic model
